# Supplementary material
Source: PubMed Central journal article supplement (PMC2695111)
Supplement: 0904115106_0904115106SI.pdf [file 0904115106_0904115106SI.pdf]

# Supporting Information

Wang et al. 10.1073/pnas.0904115106

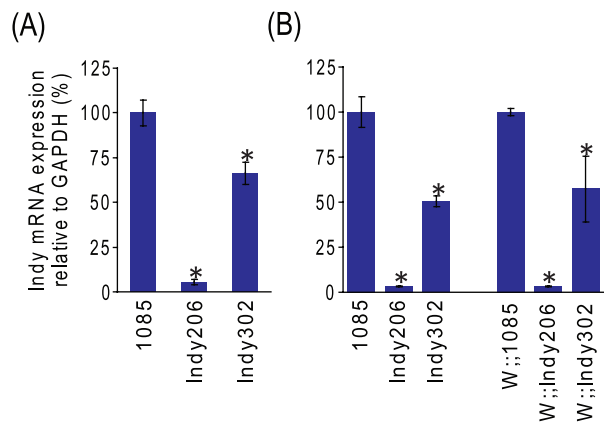

**Fig. S1.** *Indy* mutants show transcriptional defects. Real-time PCR detection of *Indy* mRNA expression levels in (A) original Canton-S derived *Indy206*, *Indy302*, and 1085 control flies (Rogina et al., 2000), and in (B) flies provided by (Toivonen et al., 2007). *Indy206* and *Indy302* homozygous flies show significant transcriptional defects before and after backcrossing into *white Dahomey* (W). Data are presented as mean  $\pm$  SD. Experiments were done in triplicate, and more than 100 flies in each group were measured. The \* indicates  $P < 0.05$  by *t* test.

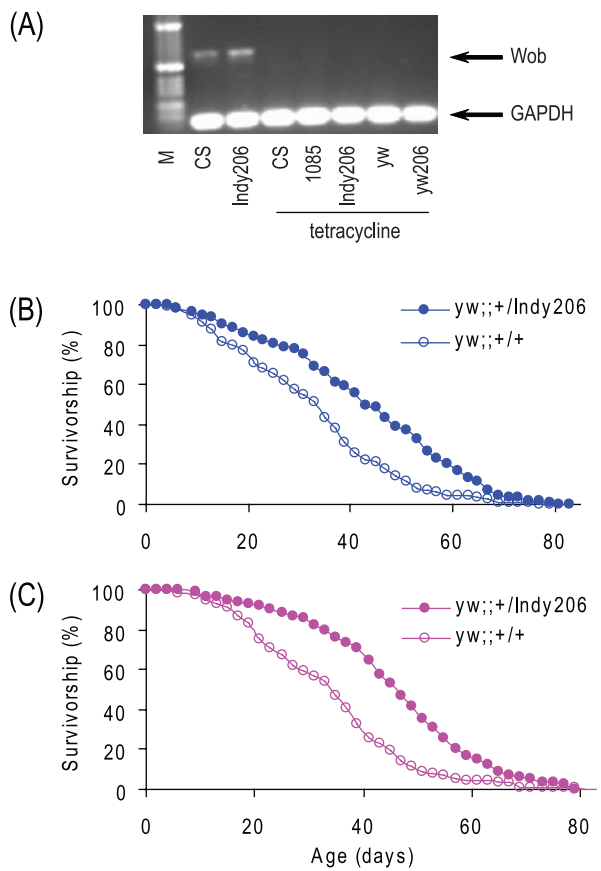

**Fig. S2.** *Wolbachia* infection does not affect *Indy* life span extension in *yw* inbred background. (A) PCR confirmation shows *Wolbachia* infection is removed after tetracycline (Tet) treatment. *Wolbachia* free *Indy206* heterozygous ( $yw;;+/206$ ) male (B) and female (C) flies both display a longer life span compared with their *yw* control ( $yw;;+/+$ ) flies in 1.5 N food condition (29% and 34% median life span extension in male and female, respectively,  $P < 0.0001$ ).

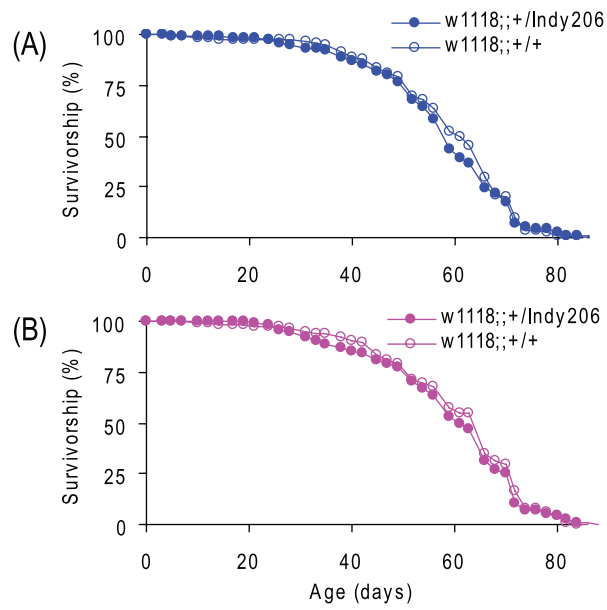

**Fig. S3.** *Indy206* heterozygous male (A) and female (B) flies in original Canton-S background (CS/*Indy206*) show 26% and 11% ( $P < 0.0001$ ) life span extension when compared with control flies (CS/1085). Life spans on 1.5 N food.

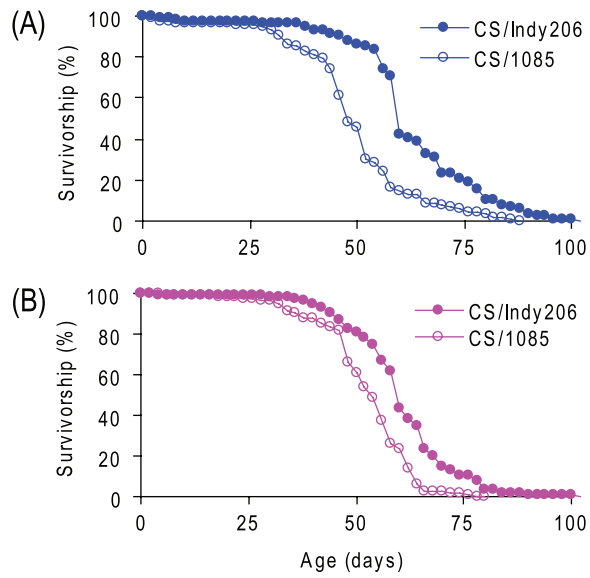

**Fig. S4.** *Indy206* heterozygous male (A) and female (B) flies in *w1118* inbred background (*w1118*;+/*Indy206*) show no life span extension when compared with control flies (*w1118*;+/+). Life spans on 1.5 N food.

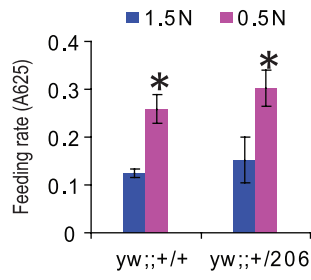

**Fig. S5.** Feeding rates of *Indy206* heterozygous (+/206) and *yw* control (+/+) flies over a 24-h period on 1.5 N (blue) or 0.5 N (red) foods with addition of 0.5% FD & C no. 1 blue food dye. The \* indicates  $P < 0.05$  by T-test.

**Table S1. The effects of different food conditions on the lifespan (LS) of male control (+/+), *Indy206* heterozygous (+/206) and *Indy206* homozygous (206/206) flies**

| Food | Genotype | Mean LS | Mean LS extension (%) | Median LS | Median LS extension (%) | Max LS | Max LS extension (%) | $\chi^2$ | <i>P</i> | Fly No. |
|------|----------|---------|-----------------------|-----------|-------------------------|--------|----------------------|----------|----------|---------|
| 1.5N | +/+      | 33      | —                     | 35        | —                       | 62     | —                    | —        | —        | 243     |
|      | +/206    | 43      | 30                    | 45        | 28.6                    | 68     | 9.7                  | 22.1     | <0.0001  | 213     |
|      | 206/206  | 36      | 9.1                   | 40        | 14.3                    | 63     | 1.6                  | 0.9      | 0.0043   | 246     |
| 1.0N | +/+      | 37      | —                     | 43        | —                       | 62     | —                    | —        | —        | 221     |
|      | +/206    | 44      | 18.9                  | 49        | 14.0                    | 68     | 9.7                  | 17.4     | <0.0001  | 214     |
|      | 206/206  | 40      | 8.1                   | 44        | 2.3                     | 60     | -3.2                 | 0.8      | 0.35     | 243     |
| 0.5N | +/+      | 43      | —                     | 48        | —                       | 65     | —                    | —        | —        | 188     |
|      | +/206    | 47      | 9.3                   | 50        | 4.2                     | 68     | 4.6                  | 4.6      | 0.03     | 241     |
|      | 206/206  | 40      | -7.0                  | 44        | -8.3                    | 58     | -10.8                | 13.6     | 0.0002   | 237     |

Mean, median and maximum lifespan, percent change of lifespan comparing to controls, chi-square in each food condition, and *P* values were derived from survivorship curves. Maximum lifespan was calculated as the median lifespan of the longest surviving 10% of the population.

**Table S2. Oligonucleotide primer sequences**

| Primer              | Sequence                        | Size, bp |
|---------------------|---------------------------------|----------|
| GAPDH-F             | 5'- GACGAAATCAAGGCTAAGGTCG -3'  | 109      |
| GAPDH-R             | 5'- AATGGGTGTCGCTGAAGAAGTC -3'  |          |
| <i>Indy</i> -F      | 5'-CTGCCCAACTCTGTCTTACTG-3'     | 150      |
| <i>Indy</i> -R      | 5'-CAGGATCAGGTACAGAGGATGGAT-3'  |          |
| dilp2-F             | 5'-AGCAAGCCTTTGTCCTTCATCTC-3'   | 118      |
| dilp2-R             | 5'-ACACCATACTCAGCACCTCGTTG-3'   |          |
| dilp3-F             | 5'-TGTGTGTATGGCTTCAACGCAATG -3' | 106      |
| dilp3-R             | 5'-CACTCAACAGTCTTCCAGCAGGG-3'   |          |
| dilp5-F             | 5'-GAGGCACCTTGGCCTATTC-3'       | 70       |
| dilp5-R             | 5'-CATGTGGTGAGATTCGGAGCTA-3'    |          |
| <i>Wolbachia</i> -F | 5'-TGGTCCAATAAGTGATGAAGAAAC-3'  | 590-632  |
| <i>Wolbachia</i> -R | 5'-AAAAATTAACGCTACTCCA-3'       |          |
